# Supplementary material
Source: ML conference proceedings conference paper supplement (https://openaccess.thecvf.com/content/CVPR2024/html/Han_JDEC_JPEG_Decoding_CVPR_2024_paper.html)
Supplement: Supplementary file 1 [file Han_JDEC_JPEG_Decoding_CVPR_2024_supplemental.pdf]

# Supplementary Material for JDEC: JPEG Decoding via Enhanced Continuous Cosine Coefficients

## A. Data Processing Inequality in JPEG

In terms of information theory [3], it’s feasible to view JPEG compression as resembling a Markov chain as follows:

$$X \rightarrow Y \rightarrow \hat{X}, \quad (1)$$

where,  $X$  is a symbol (Images),  $Y$  is a encoded file (bit-streams) and  $\hat{X}$  is decoded symbol (JPEG Images). Therefore by the data processing inequality [3], the mutual information  $I(X; Y) := \sum_{x \in \mathcal{X}} \sum_{y \in \mathcal{Y}} p(x, y) \log \frac{p(x, y)}{p(x)p(y)}$  between  $X$  and  $\hat{X}$  cannot exceed the information between  $X$  and  $Y$ . In JPEG, the equality is satisfied when a conventional decoder does not provide any losses.

$$I(X; Y) \geq I(X; \hat{X}). \quad (2)$$

The equality is satisfied when conditional mutual information  $I(X; Y | \hat{X}) = 0$ . Theoretically, a JPEG decoder should not provide loss. However, in engineering practice, loss occurs in converting the DCT spectrum back to YCbCr by performing IDCT and rounding to values of 0 and 255. Also, depending on the YCbCr to RGB matrix, precision losses occur too. Consequently, the conventional JPEG provides losses, and Eq. (2) does not satisfy equality.

## B. Implicit Neural Representation

The proposed JDEC is a function of block coordinates. To demonstrate this, the model should be able to produce results when provided with coordinates that were not observed during training. Therefore, we conducted simple super-resolution experiments using the pre-trained JDEC to represent unobserved coordinates. We maintain all settings identical, with the size of block coordinate  $\delta$  increased to  $rB \times rB$  where  $r$  is the upsampling ratio.

| q=10, $\downarrow \times 4$ |           |             |              |              |
|-----------------------------|-----------|-------------|--------------|--------------|
| Concept                     | SR w/ JAR | SR w/ o JAR | SR w/ JAR    | Decoding     |
| Method                      | RRDB[9]   | SwinIR[7]   | HST[6]       | JDEC (ours)  |
| Set5                        | 22.36     | 22.45       | <b>22.49</b> | <b>22.48</b> |

Table 1. **Quantitative comparison** for compressed image upsampling on the Set5 [1] dataset (PSNR(dB)). The JAR refers to JPEG Artifact Removal.

Fig. 1 shows that our JDEC is clearly an implicit neural representation by extracting unseen coordinates. It also

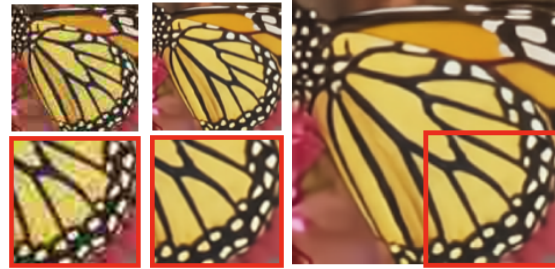

Figure 1.  $\times 2$  **upsampling of compressed image** ( $q = 10$ ) in Set-5 dataset. Note that JDEC upscales the image with the change of additional coordinates  $\delta$  without additional training. demonstrates that the resolution of estimated spectra by CCF is a function of continuous frequency. We compare our upsampling results to existing networks that aim to up-sample compressed images in Tab. 1.

## C. Computational Costs and Performance

With Fig. 2 and Tab. 2, we present an additional comparison of the computational resources including an extended FBCNN model (FBCNN+) and JDEC-CNN+. Our framework overcomes the trade-off between computational complexities and performances.

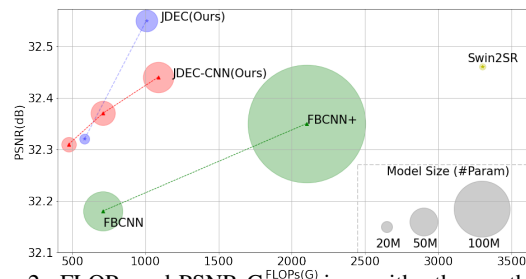

Figure 2. FLOPs and PSNR Comparison with other methods in ICB[8] ( $q = 10$ ).

| Method                  | #Params. (M) | Mem. (GB)   | Time (ms)     | FLOPs (G)      | PSNR PSNR-B (dB)   |                    |
|-------------------------|--------------|-------------|---------------|----------------|--------------------|--------------------|
|                         |              |             |               |                | q = 10             | q = 40             |
| FBCNN [5]               | 70.1         | <b>0.61</b> | 71.95         | 709.97         | 32.18 32.15        | 36.02 35.95        |
| JDEC-CNN                | <b>26.2</b>  | 0.81        | <b>56.59</b>  | <b>476.33</b>  | <b>32.31 32.27</b> | <b>36.19 36.09</b> |
| FBCNN+ <sup>†</sup> [5] | 210.3        | 1.68        | 218.58        | 2101.15        | 32.35 32.31        | 36.20 36.11        |
| JDEC-CNN+ <sup>†</sup>  | <b>54.6</b>  | <b>1.62</b> | <b>111.65</b> | <b>1086.87</b> | <b>32.43 32.39</b> | <b>36.30 36.19</b> |
| Swin2SR [2]             | 11.5         | 2.79        | 2203.59       | 3301.5         | 32.46              | - 36.25            |
| JDEC                    | 38.9         | <b>1.76</b> | <b>224.79</b> | <b>1006.72</b> | <b>32.55 32.51</b> | <b>36.37 36.28</b> |

Table 2. Computational resources & performance comparison for a  $560 \times 560$  pixels in ICB [8]. <sup>†</sup>: Our implementation

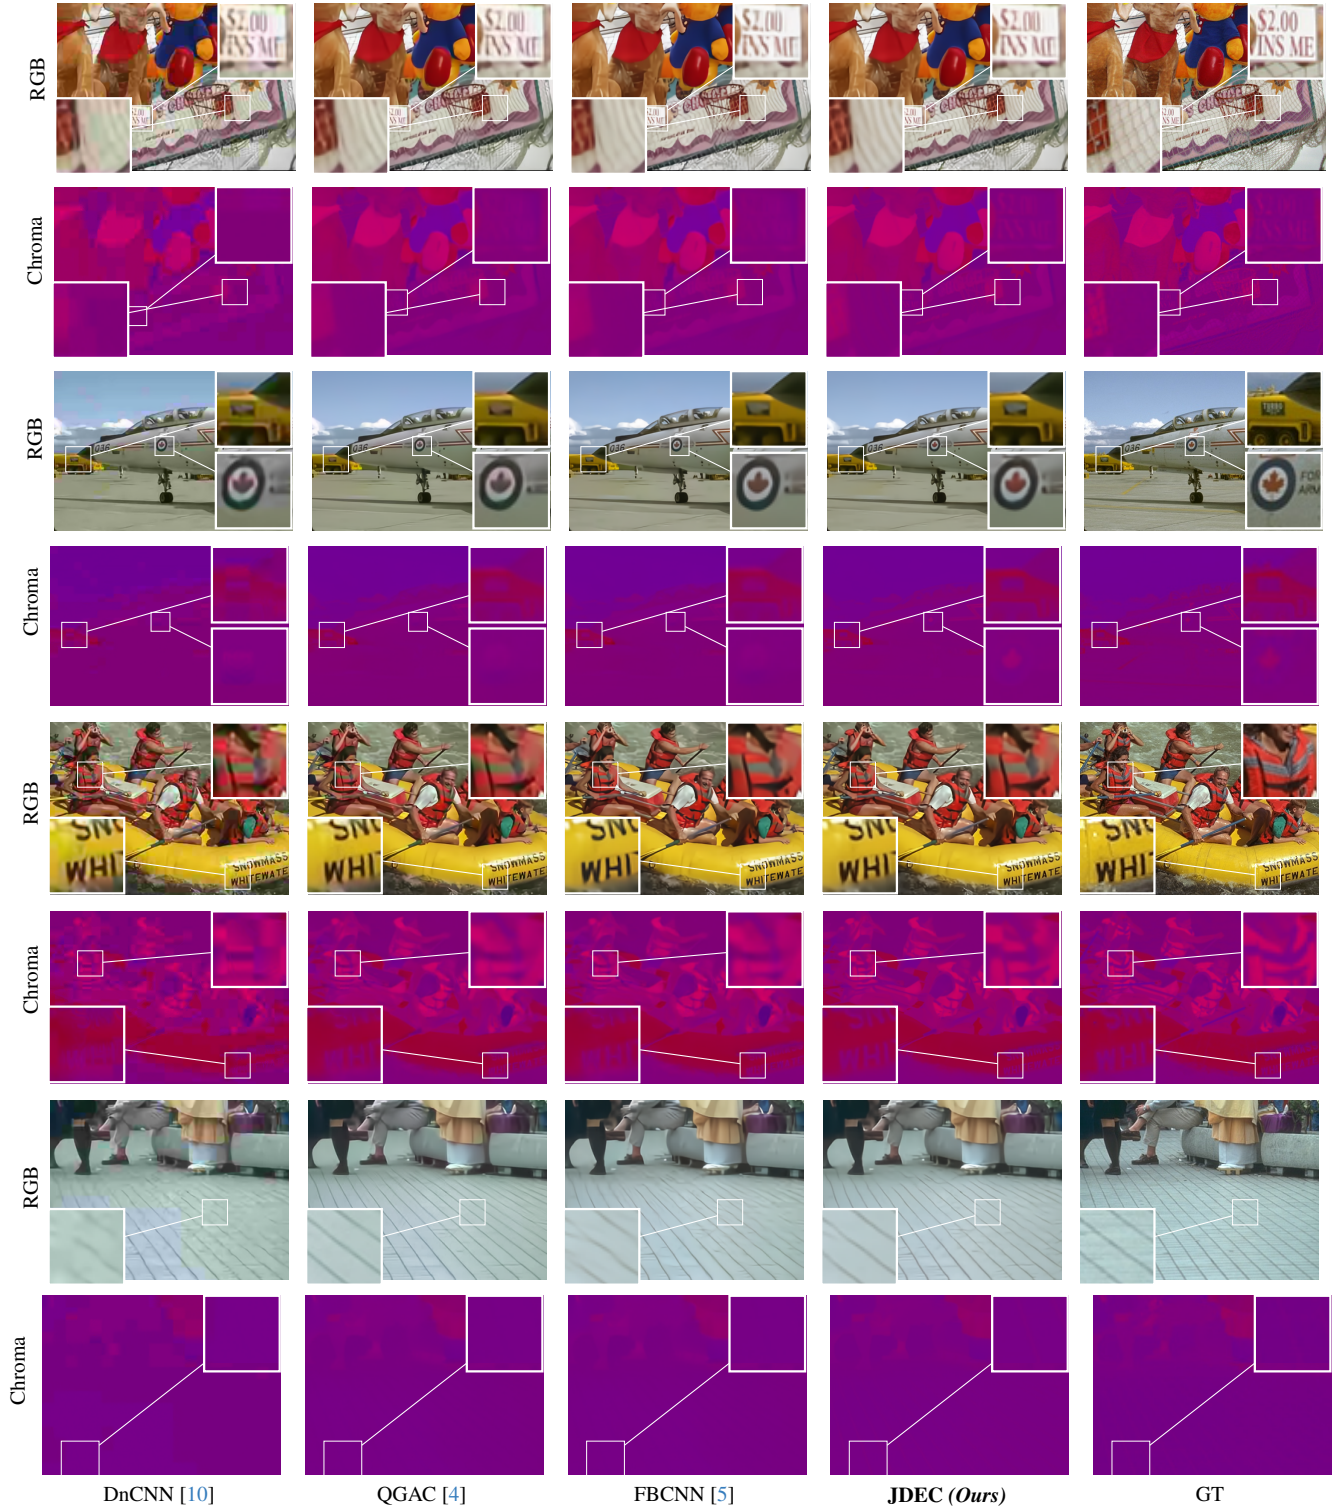

Figure 3. Additional qualitative comparison in color JPEG artifact removal ( $q = 10$ ).

## D. Additional Qualitative Results

strate the robustness of our JDEC to color distortion.

We present additional qualitative results for comparison. Additionally, we divide RGB and chroma images to demon-

## References

- [1] Marco Bevilacqua, Aline Roumy, Christine Guillemot, and Marie Line Alberi-Morel. Low-complexity single-image super-resolution based on nonnegative neighbor embedding. 2012. [1](#)
- [2] Marcos V Conde, Ui-Jin Choi, Maxime Burchi, and Radu Timofte. Swin2sr: Swinv2 transformer for compressed image super-resolution and restoration. In *European Conference on Computer Vision*, pages 669–687. Springer, 2022. [1](#)
- [3] Thomas M Cover. *Elements of information theory*. John Wiley & Sons, 1999. [1](#)
- [4] Max Ehrlich, Larry Davis, Ser-Nam Lim, and Abhinav Shrivastava. Quantization guided jpeg artifact correction. In *Computer Vision–ECCV 2020: 16th European Conference, Glasgow, UK, August 23–28, 2020, Proceedings, Part VIII 16*, pages 293–309. Springer, 2020. [2](#)
- [5] Jiayi Jiang, Kai Zhang, and Radu Timofte. Towards flexible blind jpeg artifacts removal. In *Proceedings of the IEEE/CVF International Conference on Computer Vision*, pages 4997–5006, 2021. [1](#), [2](#)
- [6] Bingchen Li, Xin Li, Yiting Lu, Sen Liu, Ruoyu Feng, and Zhibo Chen. Hst: Hierarchical swin transformer for compressed image super-resolution. In *European Conference on Computer Vision*, pages 651–668. Springer, 2022. [1](#)
- [7] Jingyun Liang, Jiezhong Cao, Guolei Sun, Kai Zhang, Luc Van Gool, and Radu Timofte. SwinIR: Image Restoration Using Swin Transformer. In *Proceedings of the IEEE/CVF International Conference on Computer Vision (ICCV) Workshops*, pages 1833–1844, 2021. [1](#)
- [8] Rawzor. Image compression benchmark. . [url: http://imagecompression.info/](http://imagecompression.info/). [1](#)
- [9] Xintao Wang, Ke Yu, Shixiang Wu, Jinjin Gu, Yihao Liu, Chao Dong, Yu Qiao, and Chen Change Loy. Esrgan: Enhanced super-resolution generative adversarial networks. In *Proceedings of the European Conference on Computer Vision (ECCV) Workshops*, 2018. [1](#)
- [10] Kai Zhang, Wangmeng Zuo, Yunjin Chen, Deyu Meng, and Lei Zhang. Beyond a gaussian denoiser: Residual learning of deep cnn for image denoising. *IEEE transactions on image processing*, 26(7):3142–3155, 2017. [2](#)
